# Supplementary material
Source: publisher figshare collection journal article supplement (https://karger.figshare.com/ndownloader/files/26505491)
Supplement: Supplementary file 1 [file 26505491]

**Suppl. Table 1a**

Copy number alterations in B16-F1. The regions of gain and loss of copy numbers, as well of breakpoints of balanced rearrangements, observed in B16-F1 and the corresponding homologue regions in humans, are listed as cytoband and position (GRCh37/hg19).

| Region | Gain | homologue region in human | |
| --- | --- | --- | --- |
| cytoband | position (GRCh37/hg19) |
| 1A1-A2 | 1x | 8q11.21  8q13.1-q13.2 | 8:50822349-51706678  8:67341263-69731257 |
| 1A3-C3 | 1x | 8q21.11  6p12.3-p12.2  6q11-q13  6p12.1-p11.2  2q14.3-q21.1  2q11.2-q12.2  13q33.1  2q32.1-q32.2  2q32.2-q34 | 8:74857354-75946793  6:49801970-52774483  6:62390139-74020088  6:56322785-57087078  2:128848774-132111282  2:97202480-106810795  13:103249353-103528345  2:189156396-190448484  2:190526146-213403565 |
| 1E2-F | 1x | 18q22.1  2q14.3  2q14.1-q14.3  2q21.2-q22.1  1q32.1-q32.2  1q21.1  1p11.2  1q32.1  1q31.3-q32.1 | 18:64168320-65184217  2:124782864-125672864  2:114462588-122525429  2:133174147-138435287  1:206136916-207534311  1:143896452-143913143  1:120837272-120855681  1:202317827-202557697  1:196621008-205912588 |
| 6pter-qter | 2x | 7q21.2-q21.3  7p22.1-p21.3  7q31.1-q36.1  7q36.1  7p15.3-p14.3  4q22.1-q22.3  4q27  1p31.3  2p11.2  2p13.3-p11.2  3q21.2-q21.3  3p25.2-p25.1  3p14.1-p12.3  3p26.3-p25.2  3q21.3-q22.1  10q11.21-q11.22  12p13.33  22q11.1-q11.21  12p13.31  12p13.33-p13.31  12p11.21  12p13.31-p11.21  12p11.21 | 7:92745197-97502117  7:7132996-12536829  7:112138919-149583263  7:150032467-150558657  7:23254035-33103246  4:89178698-95273100  4:121018693-122194687  1:67631910-68317098  2:88302422-89174373  2:68715037-87095119  3:125725101-129038484  3:12939278-15163105  3:64017713-75322601  3:61304-12897767  3:129094932-129632650  10:43277986-46218167  12:66113-2823666  22:17565811-18659740  12:8071763-9214464  12:2903120-7695890  12:30985917-31165338  12:9901365-30943693  12:31424829-32537434 |
| 8A3-A4 | 1x | 8p12  8p23.1  8p23.1-p22  4q35.2 | 8:29190581-33457624  8:8175258-9639856  8:12579403-17942494  4:188916925-190884359 |
| 8B3-C1 | 1x | 8p21.3  19p13.12-p13.11  22q12.3 | 8:19261672-20161474  19:15751695-19774502  22:33561991-35950048 |
| 8C2-D2 | 1x | 4q31.1-q31.21  19p13.2-p13.12  16q11.2 | 4:141178440-144395721  19:12721732-14682886  16:46690054-46865323 |
| 8C5-D1 | 1x | 16q12.2  16q12.2-q21  16q21 | 16:53088945-54320675  16:54964774-58768261  16:61687365-62070739 |
| 11A1 | 1x | 22q12.1-q12.2  7p13-p12.3 | 22:29168662-32014572  7:43906157-48687092 |
| 11B1-E2 | 1x | 5q35.3  5q23.3-q31.1  5q33.1-q33.2  1q42.13  17p11.2  17p12-p11.2  17p13.3 | 5:177419236-180582890  5:130494720-134063513  5:150226085-154348971  1:227916240-228700004  17:16832849-21320404  17:15848231-16472520  17:5810-1303672 |
| 11C-D | 1x | 17p13.1-p12  17q11.1-q11.2  17q11.2-q12 | 17:7825177-15648092  17:25621106-28853837  17:29109726-36105237 |
| 11E1-E2 | 1x | 17q21.2-q21.31  17q21.31  17q21.31-q21.32  17q21.32  17q23.2-q24.1 | 17:38599702-43339479  17:43340488-44633016  17:43699267-45124520  17:45195069-45518678  17:60447579-62658386 |
| 12pter-qter | 1x | 2p25.1-p23.3  1q44  2p25.1  2p25.1  2p25.3-p25.1  7q22.3-q31.1  7p21.3-p21.1  7q31.1  14q12-q22.1 | 2:10443015-26360323  1:247285277-247335310  2:9346894-9771143  2:9983483-10271545  2:38814-9143942  7:105205567-107643700  7:12610203-19748710  7:110765508-112130942  14:31028329-52197445 |
| 12F1-F2 | 1x | 14q31.3-q32.2  14q32.2-q32.33  7q36.3  7p21.1-p15.3 | 14:85996488-97398059  14:99635624-106237742  7:157331750-158937649  7:19758933-22396763 |
| 15B3-qter | 1x | 8q22.1-q24.3  22q12.3-q13.33  12p11.1  12q12-q13.2 | 8:98285717-146281416  22:36002811-51222091  12:33527173-34182629  12:38710380-54982443 |
| 17A3 | 1x | 16p13.3  5q35.1  6p21.32-p21.31 | 16:238968-3199964  5:172068269-172662360  6:33359313-35116387 |
| 17A3-B1 | 1x | 6p21.31-p21.2  21q22.13-q22.3  19p13.12 | 6:35182190-39055519  21:38437942-45115958  19:15270445-15560762 |
| 17B1 | 1x | 19p13.12  19p13.2  6p22.1-p21.32 | 19:15838834-16060768  19:8367011-8809172  6:30070674-33377701 |
| 17C-D | 1x | 3p24.3  2q12.2-q12.3  19p13.3 | 3:19189946-20227784  2:107418056-108926371  19:4229540-6459781 |
| Region | Loss | homologue region in human | |
| cytoband | position (GRCh37/hg19) |
| 2H4-qter | 1x | 20q13.32-q13.33 | 20:58152564-60512307 |
| 3F3-H4 | 1x | 1p22.1-p21.1  4q26  4q22.3-q26  1p31.3-p22.2 | 1:93913658-102462586  4:119606523-120550146  4:95373037-119274158  1:68564142-89738544 |
| 4pter-qter | 1x | 8q12.1-q12.3  8q21.3-q22.1  8q12.3  6q14.3-q16.2  9p21.2-p13.1  9q22.33-q33.2  9q21.31-q21.32  9q21.32  9p24.1-p21.2  1p32.1-p31.3  1p36.33-p32.1 | 8:56608983-62627199  8:86999552-97173020  8:63161150-63998612  6:87795216-100063454  9:27325207-38424444  9:100000765-123476748  9:84198598-85678092  9:85857905-86153461  9:6720863-27297137  1:59120411-67600639  1:895967-59012474 |
| 5A3-B1 | 1x | 7q36.1-q36.3  7q36.1 | 7:152456834-155604967  7:153584182-154685995 |
| 5D-F | 1x | 4q13.1-q22.1  1p22.2-p22.1  4p16.3  12q24.33  22q11.23-q12.1  12q23.3-q24.11  12q24.23-q24.31 | 4:62066976-89152474  1:89829605-93828149  4:492989-1107350  12:132379196-133532892  22:25202188-29153503  12:108523248-110477568  12:118573663-121477045 |
| 8E1 | 1x | 16q23.1-q24.1 | 16:76311176-84651683 |
| 10pter-qter | 1x | 6q22.31-q25.2  6q16.3-q22.1  6q22.1-q22.31  2q12.3-q13  10q21.1-q22.1  22q11.22-q11.23  21q22.3  19p13.12  19p13.3  12q23.3  22q12.3  12q13.2-q22  12q23.1-q23.3 | 6:123317116-154568001  6:100832891-116989957  6:117073363-123130865  2:109065017-111230652  10:55562531-74856732  22:22838767-25024972  21:45138975-48085036  19:15052301-15236596  19:281048-4224811  12:104343980-108155049  22:32783569-33454358  12:55341802-95044338  12:99120235-104347423 |
| 11A1-A2 | 1x | 7p12.2-p11.2  2p14-p13.3 | 7:49813257-55324313  2:68592305-68694390 |
| 11A3 | 1x | 2p16.1 | 2:56411258-61029220 |
| 11A4-A5 | 1x | 5q34-q35.1 | 5:162864575-170163636 |
| 13pter-A3 | 1x | 10p15.3-p15.1  1q42.3-q43  7p14.2-p13  6p22.3-p22.1 | 10:180405-5884095  1:235294949-240078750  7:36552456-43602938  6:20534688-29013017 |
| 14pter-qter | 1x | 3p14.3-p14.1  3p24.3-p24.1  14q22.1  6p21.2  10q22.1-q22.3  3p21.1-p14.3  3p25.1  10q11.2-q11.23  10q23.1-q23.2  14q22.1-q23.1  14q11.2-q12  14q12  13q12.12  13q12.11  13q14.2  13q12.13  13q12.12  13q14.2-q14.3  8p23.1  8p21.3-p12  13q14.11-q14.2  13q14.3-q33.1 | 3:57993765-64009700  3:23146386-27721393  14:52272055-52598781  6:39069766-39266486  10:74870164-81255099  3:52350060-57931230  3:15245114-16307845  10:46488677-51727392  10:82019368-88976316  14:52688635-58629894  14:20211286-24987352  14:25040539-25149959  13:25188452-25511922  13:20207279-23370461  13:49821990-50161404  13:25685086-26668986  13:23853398-24896355  13:50192169-52356487  8:9744629-11737304  8:20206584-29151199  13:41469941-49799059  13:53226033-103089581 |
| 15pter-B3 | 1x | 5p15.31-p13.1  8q22.1 | 5:9035138-41870621  8:97505579-98161882 |
| 18pter-qter | 1x | 10p11.21  10p12.1-p11.22  10p12.1  10p11.21  18p11.32  18q11.1-q12.3  2q14.3  5q22.1-q22.2  5q31.2-q32  5q22.2-q23.3  5q32-q33.1  18p11.22-p11.21  18q21.31-q21.32  18p11.21  18q12.3-q21.2  18q22.1-q23 | 10:35297479-35501886  10:28966271-32667726  10:27793197-28909928  10:35535953-35930362  18:158483-581524  18:18529701-40857615  2:127413509-128785694  5:110405760-112258236  5:137223657-147719412  5:112312399-129522327  5:147647743-150176296  18:10454625-11148761  18:54264439-58040001  18:11689184-13915535  18:42260138-53332018  18:66340925-77905406 |
| 19pter-B | 1x | 11q12.1-q13.3  9q21.12-q21.31 | 11:57791353-68708070  9:72658497-82341658 |
| region | breakpoint | homologue region in human | |
| cytoband | potential tumor associated genes |
| XD | t, dup | Xq21.31 | X:88676882-89676881 |
| 1A3 | t | 8q13.3 | 8:70521998-71521997 |
| 1C3 | del | 2q35 | 2:215676541-216676540 |
| 1E2 | del | 18q21.33 | 18:60920170-61920169 |
| 1F | t | 1q25.3 | 1:180882239-181882238 |
| 3A1 | dic | 8q21.13 | 8:80370572-81370571 |
| 3F3 | t | 1p21.1 | 1:107099268-108099267 |
| 5D | del | 4q13.2 | 4:69845884-70845883 |
| 5F | del | 12q24.21 | 12:115300818-116300817 |
| 8C1 | t | 4q31.21 | 4:145067174-146067173 |
| 8C5 | del | 16q21 | 16:57292130-58292129 |
| 8D | dic | 16q21 | 16:57292130-58292129 |
| 10A1 | idic | 6q23.3 | 6:137983059-138983058 |
| 11A5~B1 | dic | 5q34 | 5:162364576-163364575 |
| 11C~D | del | 17q22 | 17:52476749-53476748 |
| 11B3 | t | 17p13.1 | 17:6808194-7808193 |
| 12A1 | dic | 2p24.2 | 2:17220394-18220393 |
| 12C3 | t | 14q31.1 | 14:82281812-82781811 |
| 12F1 | t | 14q31.1 | 14:81227001-82227000 |
| 13A3 | t | 6p22.3 | 6:23626351-24626350 |
| 15A1 | dic | 5p14.1 | 5:23987210-24987209 |
| 15B3 | t | 8q24.12 | 8:120572020-121572019 |
| 16A1 | t | 16p13.2 | 16:8268423-9268422 |
| 17A3 | dic | 6p21.31 | 6:35204810-36204809 |
| 17B1 | del | 21q22.13 | 21:37937943-38937942 |
| 17C | del | 3p24.3 | 3:16699900-17699899 |
| 17D | t | 19p13.3 | 19:4469125-5469124 |
| 19A1 | dic,t | 11q12.3 | 11:62256627-63256626 |
| 19B | t | 9q21.13 | 9:74636718-75636717 |

**Suppl. Table 1b**

Copy number alterations in B16-4A5. The regions of gain and loss of copy numbers, as well of breakpoints of balanced rearrangements, observed in B16-4A5 and the corresponding homologue regions in humans, are listed as cytoband and position (GRCh37/hg19).

| **Region** | **Gain** | **Homologue Region in Human** | |
| --- | --- | --- | --- |
| **(NCBIm37/mm9)** | **Cytoband** | **Position (GRCh37/hg19)** |
| 6pter-qter | 1x | 7q21.2-q21.3  7p22.1-p21.3  7q31.1-q36.1  7q36.1  7p15.3-p14.3  4q22.1-q22.3  4q27  1p32.1-p31.3  2p11.2  2p13.3-p11.2  2p13.3-p11.2  2p13.3-p11.2  3q21.2-q21.3  3p25.2-p25.1  3p14.1-p12.3  3p14.1-p12.3  3p26.3-p25.2  3q21.3-q22.1  10q11.21-q11.22~23  12p13.33  22q11.1-q11.21  12p13.31  12p13.33-p13.31  12p11.21  12p13.31-p11.21  12p11.21 | 7:92759368-97501854  7:7196565-12443567  7:112405787-149577787  7:150019728-150558592  7:23275586-33102409  4:89011416-95264027  4:120980577-122302214  1:59041099-68299150  2:88326724-90044439  2:68694693-75938115  2:76974845-80875905  2:84650647-87089047  3:125725198-129035120  3:12938719-15140670  3:64079543-73674091  3:74311719-74570291  3:238279-12913415  3:129149787-129612419  10:38091751-51893269  12:389223-2807115  22:17565844-20745048  12:7801996-9360966  12:2904119-7656489  12:31079362-31149534  12:9747147-30907885  12:31433518-32536567 |
| 9pter-A1 | 1x | 11q22.1-q22.3 | 11:98891683-107436472 |
| 11E1-qter | 1x | 17q24.1-q24.2  17q24.2-q25.3 | 17:62950242-64188194  17:66244145-80606429 |
| 12A1-C1 | 2x | 2p25.1-p23.3  2p25.1  2p25.1  2p25.3-p25.1  7q22.3-q31.1  7p21.3-p21.1  7q31.1  14q12-q21.1 | 2:10443015-26360323  2:9346894-9771143  2:9983483-10271545  2:38814-9143942  7:105205567-107643700  7:12610203-19748710  7:107788082-112130942  14:25278862-39901704 |
| 12E-qter | 2x | 14q32.12-q32.13  14q32.13-q32.2  14q32.2-q32.2  7q36.3  7p21.1-p15.3 | 14:92524896-95090983  14:95058395-97398059  14:99635624-101351184  7:157331750-158937649  7:19758933-22396763 |
| 13D2 | 1x | 5q11.1  5p12 | 5:49692026-50690564  5:43486803-45696253 |
| **Region** | **Loss** | **Homologue Region in Human** | |
| **Cytoband** | **Position (GRCh37/hg19)** |
| 2pter-qter | 1x | 10p15.1-p12.1  10p12.1  2q22.1  2q13  9q34.11-q34.3  9q33.2-q34.11  2q22.1-q32.1  11q12.1  11q11  11p11.12  11p14.2-p11.2  15q13.3-q21.2  2q11.1-q11.2  2q13  2q13  20p13-p11.21  20p13  20q11.21-q13.32  20q13.32-q13.33 | 10:5903689-27150016  10:27399383-27531068  2:138721590-139537918  2:113730780-114036527  9:131071382-141019076  9:123514256-131051269  2:140988992-188430487  11:55926870-57587018  11:55110627-55682058  11:49973943-51516211  11:26210829-48511332  15:32933877-51298097  2:95691422-97760619  2:110841447-112945791  2:112973254-113594480  20:1544167-25604811  20:68351-1448417  20:29845467-57901047  20:58152564-62926855 |
| 3pter-E1 | 1x | 8q21.11-q21.2  8q12.3-q13.1  3q24-q25.1  3q26.2-q26.32  3q26.32-q27.1  4q27-q31.1  13q13.2-q14.11  3q25.1-q25.31 | 8:76320149-86393693  8:65492814-67090960  3:148415571-148939842  3:168801287-176915261  3:177990720-182833863  4:122589110-141075338  13:35516424-41240734  3:149086809-155658457 |
| 3F3-qter | 1x | 1p22.1-p21.1  4q26  4q22.3-q26  1p31.3-p22.2 | 1:93913658-102462586  4:119606523-120550146  4:95373037-119274158  1:68564142-89738544 |
| 4pter-qter | 1x | 8q12.1-q12.3  8q21.3-q22.1  8q12.3  6q14.3-q16.2  9p21.2-p13.1  9q22.33-q33.2  9q21.31-q21.32  9q21.32  9p24.1-p21.2  1p32.1-p31.3  1p36.33-p32.2 | 8:56608983-62627199  8:86999552-97173020  8:63161150-63998612  6:87795216-100063454  9:27325207-38424444  9:100000765-123476748  9:84198598-85678092  9:85857905-86153461  9:6720863-27297137  1:59120411-67600639  1:895967-59012474 |
| 8E1 | 2x | 16q23.1-q24.3 | 16:74907468-88851619 |
| 13pter-qA3 | 1x | 10p15.3-p15.1  1q42.3-q43  7p14.2-p13  6p22.3-p22.1 | 10:180405-5884095  1:235294949-240078750  7:36552456-43602938  6:20534688-29013017 |
| 18pter-B1 | 1x | 10p11.21  10p12.1-p11.22  10p12.1  10p11.21  18p11.32  18q11.1-q12.3  2q14.3  5q22.1-q22.2 | 10:35297479-35501886  10:28966271-32667726  10:27793197-28909928  10:35535953-35930362  18:158483-581524  18:18529701-40857615  2:127413509-128785694  5:110405760-112181936 |
| XC1 | 2x ? | Xp21.3-p21.2 | X:28605516-29974840 |
| Ypter-A1 | 2x ? | Yp11.31  Yq11.21-q11.222 | Y:2803112-2850547  Y:14813160-24564028 |
| **Region** | **Breakpoint** | **Homologue Region in Human** | |
| **Cytoband** | **Potential Tumor-associated Genes** |
| 3E1 | t | 3q25.2 | 3:153990335-154042286 |
| 3F3 | t | 1p21.1 | 3:114164661-159587168 |
| 5A1 | dic | 7q21.11 | 7:91875548-92030698 |
| 5C1 | inv | 4p15.2 | 4:23756664-23905712 |
| 6B1 | dup/inv | 7q33 | 7:136553416-136705002 |
| 6B3 | dup/inv | 4q22.1 | 4:89183315-89205921 |
| 6C1 | t | 2p11.2 | 2:84650647-84687169 |
| 6F2 | inv | 12p13.31 | 12:7096351-7178336 |
| 6G1~3 | inv | 12p12.2 | 12:20022180-21022179 |
| 8A1 | idic | 19p13.2 | 19:7112266-7294011 |
| 12A1 | idic | 2p23.3 | 2:25264999-25378243 |
| 12C1 | del | 14q12 | 14:31959162-32330430 |
| 12E | del | 14q32.12 | 14:91923955-91976898 |
| 13A3 | t | 6p22.3 | 6:20534688-21232635 |
| 13D2 | der | 5q11.2 | 5:52083774-52099880 |
| 13D2 | der | 5p12 | 5:43486803-43515247 |
| 15A1 | dic | 5p14.1 | 5:26380710-27380709 |
| 18B1 | del | 5q22.2 | 5:112043195-112181936 |

**Suppl. Table 1c**

Copy number alterations in S91 clone M3. The regions of gain and loss of copy numbers, as well of breakpoints of balanced rearrangements, observed in S91 clone M3 and the corresponding homologue regions in humans, are listed as cytoband and position (GRCh37/hg19).

| **Region** | **Gain** | **Homologue Region in Human** | |
| --- | --- | --- | --- |
| **(NCBIm37/mm9)** | **Cytoband** | **Position (GRCh37/hg19)** |
| 1pter-C4 | 1x | 8q11.21-q12.1  8q13.1-q21.11  6p12.3-p12.2  6q11-q13  6p12.1-p11.2  2q14.3-q21.1  2q11.2-q12.2  13q33.1  2q32.1-q32.2  2q32.2-q36.2 | 8:50822349-56438714  8:67341263-75946793  6:49801970-52774483  6:62390139-74020088  6:56322785-57087078  2:128848774-132111282  2:97202480-106810795  13:103249353-103528345  2:189156396-190448484  2:190526146-225450110 |
| 1C4-G3 | 2x | 2q36.2-q37.3  5q21.1  18q21.32-q22.1  2q14.3  2q14.1-q14.3  2q21.2-q22.1  1q32.1-q32.2  1p11.2  1q21.1  1q25.3-q32.1 | 2:225629807-242801060  5:99871009-102614361  18:59000988-65184217  2:124782864-125672864  2:114462588-122525429  2:133174147-138435287  1:206136916-207534311  1:120837272-120855681  1:143896452-143913143  1:184356192-205912588 |
| 1G3-qter | 1x | 1q23.1-q25.3  1q43-q44  1q32.2-q42.13 | 1:158516918-184043346  1:240177648-247095280  1:207627575-227506175 |
| 6B2-qter | 1x | 7q36.1  7q36.1  7p15.3-p14.3  4q22.1-q22.3  4q27  1p31.3  2p11.2  2p13.3-p11.2  3q21.2-q21.3  3p25.2-p25.1  3p14.1-p12.3  3p26.3-p26.3  3p.26.1-p25.2  3q21.3-q22.1  10q11.21-q11.22  12p13.33  22q11.1-q11.21  12p13.31  12p13.31-p13.31 | 7:149169885-149577787  7:150019728-150558592  7:23275586-33102409  4:89011416-95264027  4:120980577-122302214  1:67632083-68299150 x  2:88326724-90044439  2:68694693-87089047  3:125725198-129035120  3:12938719-15140670  3:64079543-74570291  3:238279-2140497  3:6811688-12913415  3:129149787-129612419  10:43278249-47949417  12:389223-2807115  22:17565844-20745048  12:7801996-9360966  12:6437923-7656489 x |
| 8A1-E2 | 1x | 19p13.2  13q33.1-q34  8p23.3-p23.2  8p23.2-p23.1  13q14.3  8p11.23-p11.21  8p11.21  8p12  8p23.1  8p23.1-p22  4q32.2-q35.2  8p22-p21.3  19p13.12-p13.11  22q12.3  4q31.1-q31.23  19p13.2-p13.12  16q11.2-q22.1  16q22.1-q24.3  1q42.13-q42.3  10p11.22-p11.21 | 19:7112266-8327305  13:103696350-115092796  8:356428-4852494  8:6264113-7754233  13:52436117-53050485  8:36641842-42408151  8:42552519-43057998  8:29190581-35654068  8:8175258-9639856  8:12579403-17942494  4:164031225-190884359  8:18248755-20161474  19:15751695-19774502  22:33561991-35950048  4:141178440-149365850  19:12721732-14682886  16:46690054-69975644  16:69984810-90111383  1:228870824-235324772  10:32735041-35104253 |
| 10C1-qter | 2x | 12q23.3  22q12.3  12q13.2-q23.3 | 12:106976685-108155049  22:32783569-33454358  12:55341802-104347423 |
| 11E2 | 1x | 17q25.1-q25.3 | 17:73314157-81052864 |
| 12D2-F1 | 1x | 14q24.3-q32.33  7q36.3  7p21.1-p15.3 | 14:74752126-106237742  7:157331750-158937649  7:20176020-22396763 |
| 13pter-A3 | 1x | 10p15.3-p15.1  1q42.3-q43  7p14.2-p13  6p22.3-p22.1  6p25.3-p25.2 | 10:180405-5884095  1:235294949-240078750  7:36552456-43602938  6:20100935-29013017  6:292097-3457256 |
| 15pter-qter | 1x | 5p15.31-p12  8q22.1-q24.3  22q12.3-q13.33  12p11.1  12q12-q13.2 | 5:9035138-42887494  8:97505579-146281416  22:36002811-51222091  12:33527173-38717784  12:39040624-54982443 |
| 19C2-D1 | 1x | 10q23.32-q25.1 | 10:93558069-107024993 |
| XA1-F5 | 3n [33.3%] | Xp11.23-p11.22  Xp21.1-p11.23  Xq23-q24  gap - 7q31.2  Xq24-q27.1  Xq27.2-q28  Xq23  Xp22.11-p21.1  Xq11.1-q23  Yp11.2  Xp11.22-p11.21  Xp22.2  Xp22.2-p22.11 | X:47967365-52790617  X:37208583-48271344  X:115301975-117590949  7:115850547-115898837  X:117629861-139866723  X:140269934-154688276  X:114795501-114885181  X:23851470-37316548  X:62567107-117960931  Y:3447082-5610265  X:52920336-556593443  X:9693386-9936134  X:9935392-23804343 |
| **Region** | **Loss** | **Homologue Region in Human** | |
| **Cytoband** | **Position (GRCh37/hg19)** |
| 2C2-E5 | 1x | 2q31.1-q32.1  11q12.1  11q11  11p11.12  11p14.2-p11.2  15q13.2-q15.3 | 2:170550975-188430487  11:55702932-57587018  11:55110627-55682058  11:49973943-51516211  11:26210829-48511332  15:30916697-43829571 |
| 4D1-qter | 2x | 1p36.13-p33  1p36.31-p36.13  1p36.33-p36.31 | 1:19401000-48462567  1:6673745-19283180  1:895967-6674667 |
| 5E4-G2 | 1x | 4q21.22-q22.1  1p22.2-p22.1  4p16.3  12q24.33  22q11.23-q12.1  12q23.3-q24.11  12q24.11-q24.31  12q24.31-q24.33  7p11.2  7q11.21-q11.22 | 4:83273651-89152474  1:89829605-93828149  4:492989-1107350  12:132379196-133532892  22:25202188-29153503  12:108523248-110477568  12:110562140-121477045  12:121570622-132336328  7:55861237-56184093  7:65338254-71912148 |
| 7C | 1x | 15q11.2  15q13.1-q13.3  15q26.3 | 15:23810454-23932450  15:29129629-32464722  15:102161847-102264807 |
| 9A4-E3 | 1x | 11q22.3-q24.3  15q21.2  15q21.2-q25.1  6p12.2-p12.1  6q13-q14.2 | 11:107461817-129872730  15:51348795-51915030  15:51973550-79012628  6:52866077-55740362  6:74062785-84140797 |
| 9F2-F3 | 1x | 3p21.31  3p24.1-p22.2  3p22.2 | 3:46448654-49295537  3:27757440-37225180  3:37284668-37865005 |
| 11B3-D | 1x | 17p13.3-p12  17q11.1-q11.2  17q11.2-q12  17q22-q23.2 | 17:5810-11873485  17:25621106-28853837  17:29109726-36105237  17:53046088-60142643 |
| 13A3-D2 | 1x | 6p25.2-p23  6p23-p22.3  9q22.1-q22.32  5q35.2-q35.3  5q31.1-q31.2  9q21.32-q21.33  9q22.32-q22.33  9p13.1-p11.1  9q12-q13  9p11.2-p11.1  8q22.1  5p15.33-p15.31  5q14.3-q15  5q13.2-q14.3  5q11.1-q13.2  1p11.2  5p12 | 6:3269196-14137149  6:15245734-19840915  9:94972489-99704572  5:174151536-177037348  5:134074191-137090039  9:84603687-90323548  9:97321002-99801925  9:39072764-41506925  9:65503363-65509610  9:43624507-47314322  8:97238148-97349223  5:191626-7906138  5:85913721-96143803  5:69345350-83680611  5:49692026-70363516  no region/gene affected 5:43486803-45696253 |
| 19pter-C2 | 1x | 11q12.1-q13.3  9q21.11-q21.31  2q13  9p24.3-p24.1  10q11.23-q21.1  10q23.2-q23.32 | 11:57791353-68708070  9:69199480-82341658  2:114195268-114253766  9:116237-6645650  10:51884446-54531460  10:89264632-93392828 |
| 19D1-D2 | 2x | 10q25.1-q25.3 | 10:108336940-117708503 |
| **Region** | **Breakpoint** | **Homologue Region in Human** | |
| **Cytoband** | **Potential Tumor-associated Genes** |
| 1G3 | t/ dup | 1q25.3 | 1:180882239-181882238 |
| 1C4 | dup | 2q36.3 | 2:226265364-226518734 |
| 2E5 | t/ del | 15q15.1 | 15:41101467-42101466 |
| 2C2 | del | 2q31.1 | 2:163949907-164949906 |
| 4D1 | del | 1p35.3 | 1:28974256-29974255 |
| 4D3 | del | 1p36.13 | 1:19230774-19283180 |
| 5E4 | del | 4q21.22 | 4:82347547-82393082 |
| 5G2 | del | 7q11.22 | 7:69063905-70258054 |
| 6F3 | dup | 12p13.31 | 12:6437923-6451280 |
| 6B2 | dup | 7q36.1 | 7:149535456-149564568 |
| 8A2 | inv | 8p11.21 | 8:40388109-40755352 |
| 8B2~3 | inv | 4q32.3 | 4:167654535-168155947 |
| 9A4 | del | 11q24.3 | 11:129769601-129872730 |
| 9E3 | del | 6q14.2 | 6:83920108-84140797 |
| 10B1 | inv | 6q22.33 | 6:128029217-128239776 |
| 10D3 | inv | 12q13.2 | 12:55413729-55423798 |
| 10C1 | dic | 12q23.3 | 12:106976685-107156581 |
| 11B3 | del | 17p12 | 17:11501748-11873485 |
| 11D | del | 17q22 | 17:53046088-53241646 |
| 11E2 | t | 17q25.1 | 17:73643457-73643645 |
| 12A1 | dic | 2p23.3 | 2:26256976-26360323 |
| 12D1 | t | 14q24.3 | 14:74964873-75079306 |
| 13A1 | dic | 10p15.1 | 10:5029967-5060207 |
| 13A3 | dic | 6p25.2 | 6:3269196-3457256 |
| 19C2 | t | 10q23.32 | 10:93558069-93625033 |
